# Supplementary material for: The SlFSR gene controls fruit shelf-life in tomato
Source: PubMed Central journal article supplement (PMC5972576; doi:10.1093/jxb/ery116), 2018-04-04
Supplement: ery116_suppl_supplementary_figure_s1.pdf [file ery116_suppl_supplementary_figure_s1.pdf]

**Running title:** *SIFSR* plays a role in tomato fruit shelf-life

**Title:**

The *SIFSR* gene controls fruit shelf-life in tomato

**Authors:** Lincheng Zhang\*, Mingku Zhu\*, Lijun Ren\*, Anzhou Li, Guoping Chen and Zongli Hu

Key Laboratory of Biorheological Science and Technology (Chongqing University),  
Ministry of Education, Bioengineering College, Chongqing University, Chongqing  
400044, People's Republic of China

---

\*These authors contributed equally to this work

1 **Guoping Chen**(Author for Correspondence): Room 523, Bioengineering College,  
2 Chongqing University, Campus B, 174 Shapingba Main Street, Chongqing 400030,  
3 P.R. China; **Tel:** 00862365112674; **Fax:** 00862365112674; **E-mail:** Guoping Chen:  
4 [chenguoping@cqu.edu.cn](mailto:chenguoping@cqu.edu.cn)

5  
6 **Zongli Hu** (Author for Correspondence): Room 523, Bioengineering College,  
7 Chongqing University, Campus B, 174 Shapingba Main Street, Chongqing 400030,  
8 P.R. China; **Tel:** 00862365112674; **Fax:** 00862365112674; **E-mail:** Zongli Hu:  
9 [huzongli71@163.com](mailto:huzongli71@163.com)

10

11 **The e-mail addresses of the authors:**

12 Lincheng Zhang: [zhangle201312@163.com](mailto:zhangle201312@163.com)

13 Mingku Zhu: [mingkuzhu007@126.com](mailto:mingkuzhu007@126.com)

14 Lijun Ren: [renlijun403@163.com](mailto:renlijun403@163.com)

15 Anzhou Li: [lianzhou6375@163.com](mailto:lianzhou6375@163.com)

16 Received 20 November 201

17

18 **Figure legends**

19

20 **Fig. S1** Putative cis-elements enriched in the promoter of *SIFSR* gene. The start codon is shown as  
21 ATG

22

23 **Fig. S1**

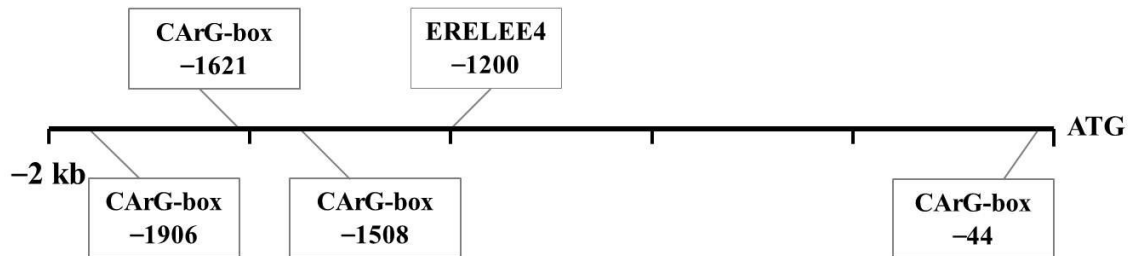

**CArG-box** [C(C/T)(A/T)6(A/G)G]: binding site for RIN transcription factor.

-1906, CATTTTAAAG; -1621, CCATTTTAAAG; -1508, CAATATTTTG, -44, CATTTTATTG.

**ERELEE4** (AWTTCAAA): ethylene responsive element. -1200, AATTCAAA. W=A/T.

24

25
