# Supplementary material for: The SlFSR gene controls fruit shelf-life in tomato
Source: PubMed Central journal article supplement (PMC5972576; doi:10.1093/jxb/ery116), 2018-04-04
Supplement: ery116_suppl_supplementary_table_s1.pdf [file ery116_suppl_supplementary_table_s1.pdf]

**Running title:** *SIFSR* plays a role in tomato fruit shelf-life

**Title:**

The *SIFSR* gene controls fruit shelf-life in tomato

**Authors:** Lincheng Zhang\*, Mingku Zhu\*, Lijun Ren\*, Anzhou Li, Guoping Chen and Zongli Hu

Key Laboratory of Biorheological Science and Technology (Chongqing University),  
Ministry of Education, Bioengineering College, Chongqing University, Chongqing  
400044, People's Republic of China

---

\*These authors contributed equally to this work

1 **Guoping Chen**(Author for Correspondence): Room 523, Bioengineering College,  
2 Chongqing University, Campus B, 174 Shapingba Main Street, Chongqing 400030,  
3 P.R. China; **Tel:** 00862365112674; **Fax:** 00862365112674; **E-mail:** Guoping Chen:  
4 [chengguoping@cqu.edu.cn](mailto:chengguoping@cqu.edu.cn)

5  
6 **Zongli Hu** (Author for Correspondence): Room 523, Bioengineering College,  
7 Chongqing University, Campus B, 174 Shapingba Main Street, Chongqing 400030,  
8 P.R. China; **Tel:** 00862365112674; **Fax:** 00862365112674; **E-mail:** Zongli Hu:  
9 [huzongli71@163.com](mailto:huzongli71@163.com)

10  
11 **The e-mail addresses of the authors:**

12 Lincheng Zhang: [zhangle201312@163.com](mailto:zhangle201312@163.com)

13 Mingku Zhu: [mingkuzhu007@126.com](mailto:mingkuzhu007@126.com)

14 Lijun Ren: [renlijun403@163.com](mailto:renlijun403@163.com)

15 Anzhou Li: [lianzhou6375@163.com](mailto:lianzhou6375@163.com)

16 Received 20 November 201

17

18

19 **Table S1** Specific primer sequences used for gene amplification and qRT-PCR analysis.

| Primer code                       | Primer sequences (5' →3')         | Application                                                                                  |
|-----------------------------------|-----------------------------------|----------------------------------------------------------------------------------------------|
| <i>CAC-Q-F</i>                    | CCTCCGTTGTGATGTAAGTGG             | Internal standard gene for Quantitative                                                      |
| <i>CAC-Q-R</i>                    | ATTGGTGGAAAGTAACATCATCG           | RT-PCR in tomato development                                                                 |
| <i>EF1<math>\alpha</math>-Q-F</i> | TACTGGTGGTTTTGAAGCTG              | Internal standard gene for Quantitative                                                      |
| <i>EF1<math>\alpha</math>-Q-R</i> | AACTTCCTTCACGATTTCATCATA          | RT-PCR under ACC treatment                                                                   |
| <i>SIFSR-Q-F</i>                  | GAACTCTACAACCATTCCCCTCC           | Quantitative RT-PCR analysis for                                                             |
| <i>SIFSR-Q-R</i>                  | TAATAGTTTCTCCAACATGCTCCA          | <i>SIFSR</i>                                                                                 |
| <i>SIFSR-RNAi-F</i>               | CGGGGTACCATCGATATTGGGAGCCTTGATGGA | To establish <i>SIFSR</i> RNAi lines; added<br><i>Kpn</i> I and <i>Cla</i> I site underlined |
| <i>SIFSR-RNAi-R</i>               | CCGCTCGAGTCTAGACGCGAGACGAAAGTGCA  | To establish <i>SIFSR</i> RNAi lines; added<br><i>Xho</i> I and <i>Xba</i> I site underlined |
| <i>SIFSR-over-F</i>               | GCTCTAGACTCTTCACCCGCAGACCTAA      | To establish <i>SIFSR</i> overexpression                                                     |

---

|                     |                               |                                           |
|---------------------|-------------------------------|-------------------------------------------|
| <i>SIFSR-over-R</i> | CGAGCTCCAATGGACCACTTTGAGAATGA | lines; added <i>Xba</i> I site underlined |
|                     |                               | To establish <i>SIFSR</i> overexpression  |
|                     |                               | lines; added <i>Sac</i> I site underlined |
| <i>NPT II-F</i>     | GACAATCGGCTGCTCTGA            | Positive transgenic plants detection      |
| <i>NPT II-R</i>     | AACTCCAGCATGAGATCC            |                                           |
| <i>PSYI-Q-F</i>     | AGAGGTGGTGAAAGCAA             | Quantitative RT-PCR analysis for          |
| <i>PSYI-Q-R</i>     | TCTCGGGAGTCATTAGCAT           | ethylene- and ripening-related genes      |
| <i>ACO1-Q-F</i>     | ACAAACAGACGGGACACGAA          |                                           |
| <i>ACO1-Q-R</i>     | CTCTTTGGCTTGAAACTTGA          |                                           |
| <i>E8-Q-F</i>       | GGCACCATTCAACATACCG           |                                           |
| <i>E8-Q-R</i>       | CTTTCACCGAAGAAGCACG           |                                           |
| <i>RIN-Q-F</i>      | GGAACCCAAACTTCATCAGA          |                                           |
| <i>RIN-Q-R</i>      | TTGTCCCAAATCCTCACCTA          |                                           |
| <i>LOXB-Q-F</i>     | TGCTACAATGACTTGGGTGAA         |                                           |
| <i>LOXB-Q-R</i>     | CCTGTCCTGCCTCTACG             |                                           |
| <i>PG-Q-F</i>       | ATACAACAGTTTTTCAGCAGTTCAAGT   | Quantitative RT-PCR analysis for          |
| <i>PG-Q-R</i>       | GGTTTTCCACTTTCCCTACTAA        | cell wall metabolism-related genes        |
| <i>PEI-Q-F</i>      | GCTTGCGTCTTTGACAACTCAGG       |                                           |
| <i>PEI-Q-R</i>      | GTGCCACCACTGCATTCGCTAT        |                                           |
| <i>XYL1-Q-F</i>     | TGATCGGCAATTATGAAGGTATTC      |                                           |
| <i>XYL1-Q-R</i>     | CAGCACATCCTGGCTTGTAAT         |                                           |
| <i>XTH5-Q-F</i>     | CCACCACCAGAGTGCGAGAT          |                                           |
| <i>XTH5-Q-R</i>     | TTTTCTTAGGATGACGATGTCCG       |                                           |
| <i>CEL2-Q-F</i>     | ACACATTGCCAAACGTCAGGT         |                                           |
| <i>CEL2-Q-R</i>     | CCCCTATGGTGAATCCTTTGTG        |                                           |
| <i>EXP1-Q-F</i>     | CCCTCCTCGCCCTCACTTT           |                                           |
| <i>EXP1-Q-R</i>     | TCTGATTCCCTCCTTGCTTTCG        |                                           |
| <i>PL-Q-F</i>       | GCGATCAGGAGTTAGAACTGG         |                                           |
| <i>PL-Q-R</i>       | AATCCCCTTTTGCTTTGGTT          |                                           |
| <i>TBG4-Q-F</i>     | AAATGGTGAAGGCGTAGGTTCG        |                                           |
| <i>TBG4-Q-R</i>     | AGGTTGTCCGCAGTTAGTCTGG        |                                           |
| <i>MAN1-Q-F</i>     | ACACCGTCCTCCTGAGATTGG         |                                           |
| <i>MAN1-Q-R</i>     | GAGCCTCTGCTTTCCACTTTAATC      |                                           |

---
